# Supplementary material for: Cardiopulmonary exercise testing might be helpful for interpretation of impaired pulmonary function in recovered COVID-19 patients
Source: PubMed Central journal article supplement — Eur Respir J. 2021 Jan 28;57(1):2004265. doi: 10.1183/13993003.04265-2020 (PMC7758779; doi:10.1183/13993003.04265-2020), 2021-01-28
Supplement: ERJ-04265-2020.Shareable.pdf [file ERJ-04265-2020.Shareable.pdf]

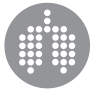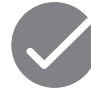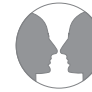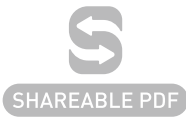

# Cardiopulmonary exercise testing might be helpful for interpretation of impaired pulmonary function in recovered COVID-19 patients

Yi Gao <sup>1,3</sup>, Ruchong Chen<sup>1,3</sup>, Qian Geng<sup>1</sup>, Xiaoneng Mo<sup>2</sup>, Chen Zhan<sup>1</sup>,  
Wenhua Jian<sup>1</sup>, Shiyue Li<sup>1,4</sup> and Jinping Zheng<sup>1,4</sup>

**Affiliations:** <sup>1</sup>State Key Laboratory of Respiratory Disease, National Clinical Research Center for Respiratory Disease, Guangzhou Institute of Respiratory Health, First Affiliated Hospital of Guangzhou Medical University, Guangzhou, China. <sup>2</sup>Department of Respiratory Medicine, Guangzhou Eighth People's Hospital, Guangzhou, China. <sup>3</sup>Y. Gao and R. Chen contributed equally as joint first authors. <sup>4</sup>J. Zheng and S. Li contributed equally to this article as lead authors and supervised the work.

**Correspondence:** Jinping Zheng, State Key Laboratory of Respiratory Disease, National Clinical Research Center for Respiratory Disease, Guangzhou Institute of Respiratory Health, First Affiliated Hospital of Guangzhou Medical University, 151 Yanjiang Rd, Guangzhou, Guangdong 510120, China. E-mail: jpzhenggy@163.com

 @ERSpublications

**Besides the impaired lung diffusion capacity, impairment of exercise endurance in recovered patients with COVID-19 should also be considered** <https://bit.ly/3qrzPDY>

**Cite this article as:** Gao Y, Chen R, Geng Q, *et al.* Cardiopulmonary exercise testing might be helpful for interpretation of impaired pulmonary function in recovered COVID-19 patients. *Eur Respir J* 2021; 57: 2004265 [https://doi.org/10.1183/13993003.04265-2020].

This single-page version can be shared freely online.

*Reply to D.G. Chapman and co-workers:*
